# Supplementary material for: A theoretical study on the signal transduction process of bacterial photoreceptor PpSB1 based on the Markov state model
Source: Royal Society of Chemistry journal article supplement (doi:10.1039/d0cp05532h), 2020-12-28
Supplement: d0cp05532h1.pdf [file d0cp05532h1.pdf]

# **Theoretical Study on Signal Transduction Process of Bacterial Photoreceptor PpSB1 Based on Markov State Model**

Yajie Zhao <sup>a</sup>, Yue Zhang <sup>a</sup>, Minzhang Sun<sup>a</sup> and Qingchuan Zheng <sup>a, b\*</sup>

<sup>a</sup> Laboratory of Theoretical and Computational Chemistry, Institute of Theoretical Chemistry, International Joint Research Laboratory of Nano-Micro Architecture Chemistry, College of Chemistry, Jilin University, Changchun 130023, People's Republic of China

<sup>b</sup> Key Laboratory for Molecular Enzymology and Engineering of the Ministry of Education, Jilin University, Changchun 130023, People's Republic of China

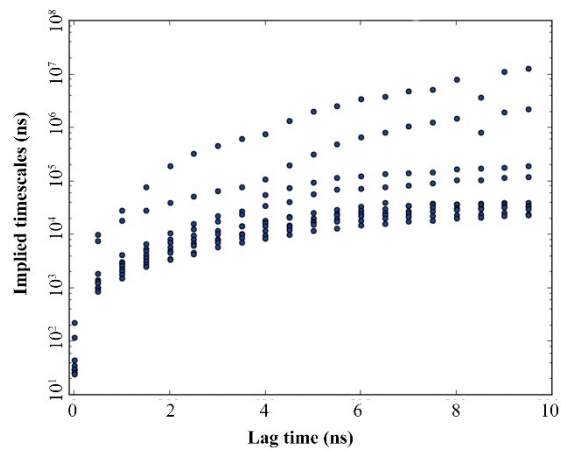

**Figure S1.** Markov state models of PpSB1-LOV domain. A plot of the implied time scales for a series of 161 microstate Markov state model built at lag time from 1 to 20 ns. The slowest time scales level out around 4 ns, which indicated the model was Markovian. The lag time was selected for the microstate model. The implied time scales suggested that there were 3 slowly processes. Thus, the higher resolution MSMs with five states would be constructed.

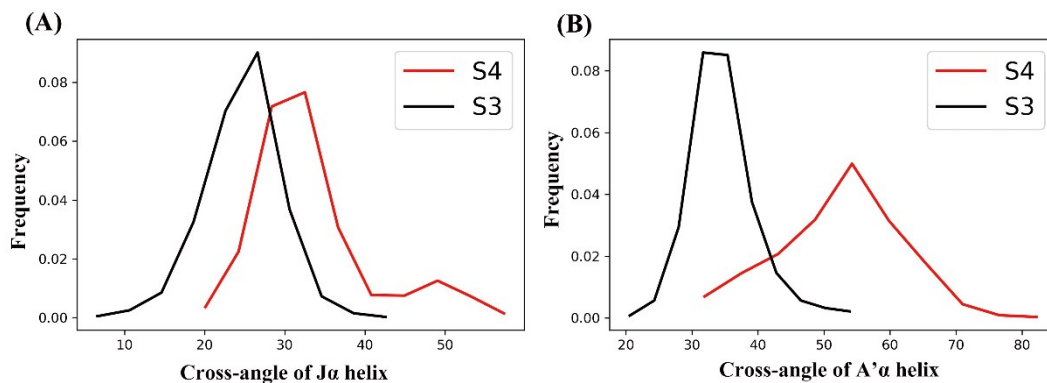

**Figure S2.** Increase of the cross-angle of  $J\alpha$  and  $A'\alpha$  helices in the S3 and S4, respectively. (A)  $J\alpha$  helix. (B)  $A'\alpha$  helix.
